# Supplementary material for: Transcriptional regulation of Acsl1 by CHREBP and NF-kappa B in macrophages during hyperglycemia and inflammation
Source: PubMed Central journal article supplement (PMC9439225; doi:10.1371/journal.pone.0272986), 2022-09-02
Supplement: pone.0272986.s003.pdf [file pone.0272986.s003.pdf]

### Supplementary Figure 3

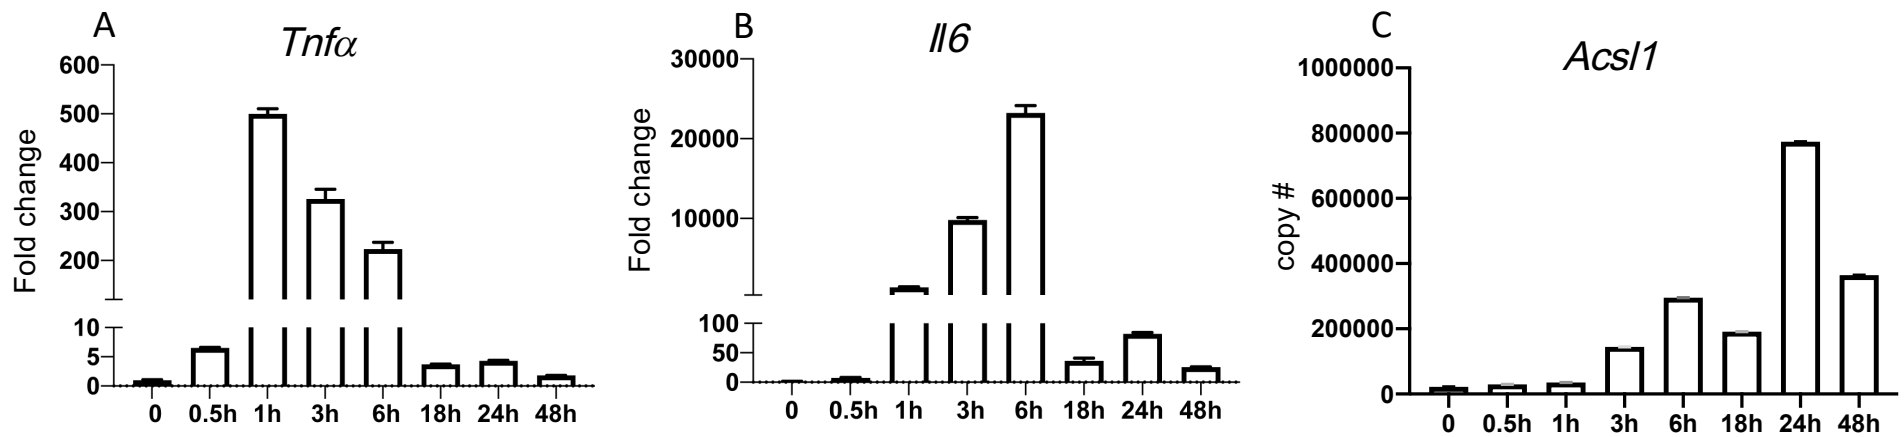

#### S3 Fig. Kinetics of *Acs11* induction by LPS treatment.

BMDMs were differentiated in NG and treated with LPS (10ng/ml). RNA was isolated at the indicated times, cDNA was synthesized, and *Tnf*, *Il6*, and *Acs11* mRNA were determined by qPCR relative to cyclophilin A. The data presented are means  $\pm$  standard errors of the means of two independent experiments.
