# Supplementary material for: Transcriptional regulation of Acsl1 by CHREBP and NF-kappa B in macrophages during hyperglycemia and inflammation
Source: PubMed Central journal article supplement (PMC9439225; doi:10.1371/journal.pone.0272986), 2022-09-02
Supplement: pone.0272986.s005.pdf [file pone.0272986.s005.pdf]

## Supplementary Figure 5

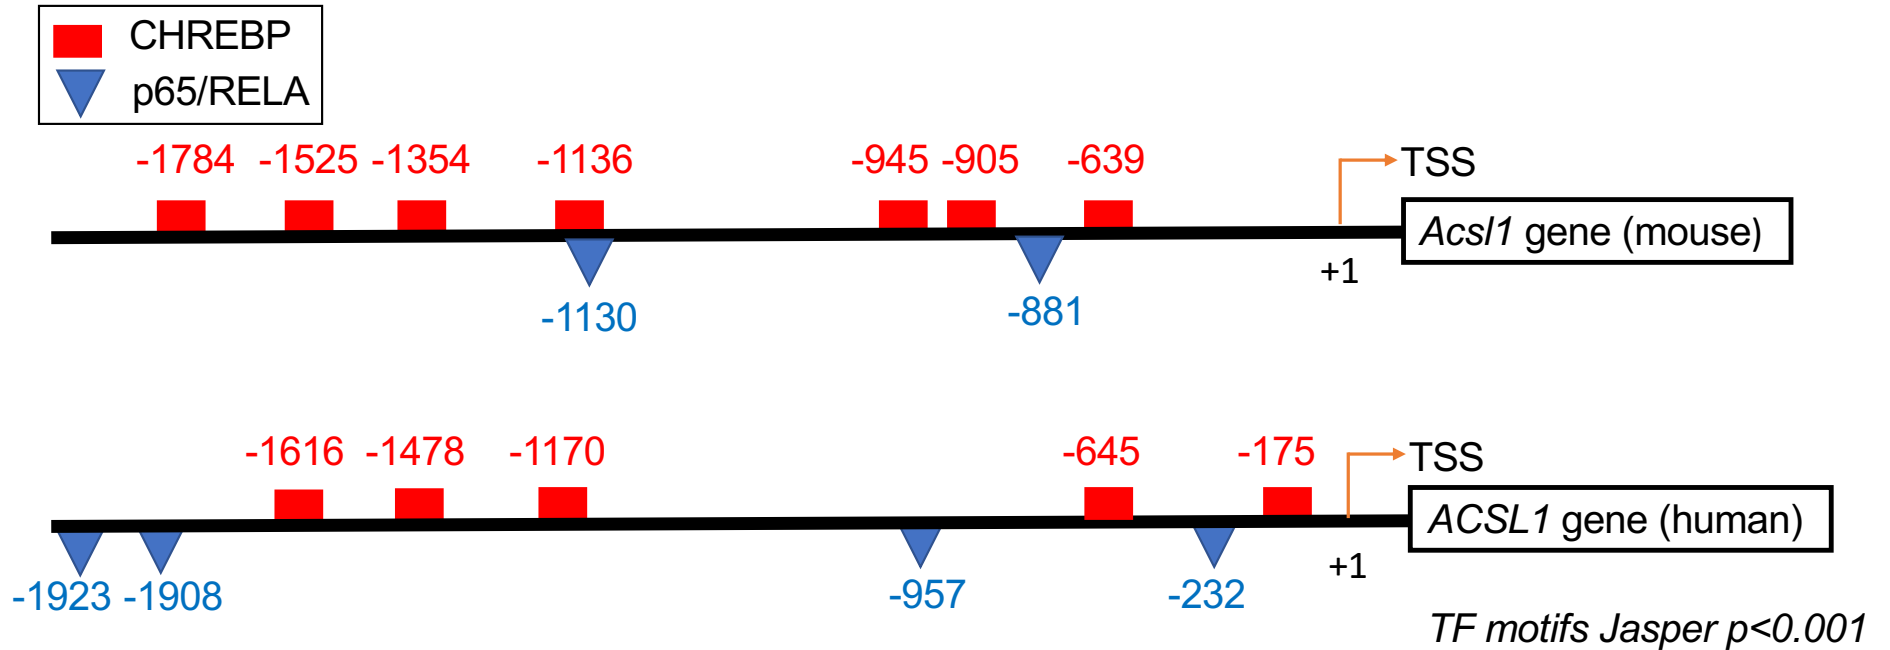

### S5 Fig. Predicted CHREBP and NF-kappa B DNA binding motifs upstream of the mouse and human ACSL1 genes.

The Eukaryotic Promoter Database tool was used to predict putative binding sites for CHREBP (red rectangles) and NFκB (blue triangles) 2Kb upstream of the mouse and human promoter using the transcription factor motifs present in the Jasper database. The P-value used for the motif prediction was  $p < 0.001$ .
